# Supplementary material
Source: PubMed Central journal article supplement (PMC9746351)

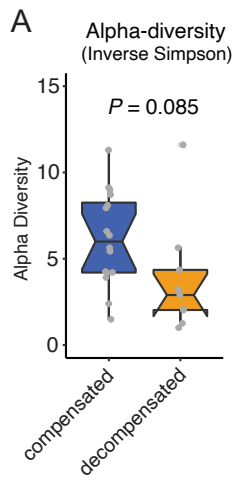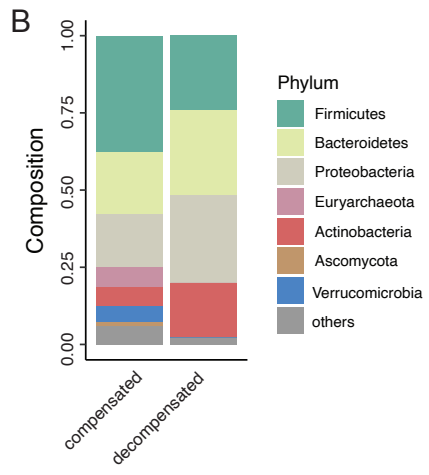

Supplement: NIHMS1845680-supplement-Supp_1.pdf [file NIHMS1845680-supplement-Supp_1.pdf]

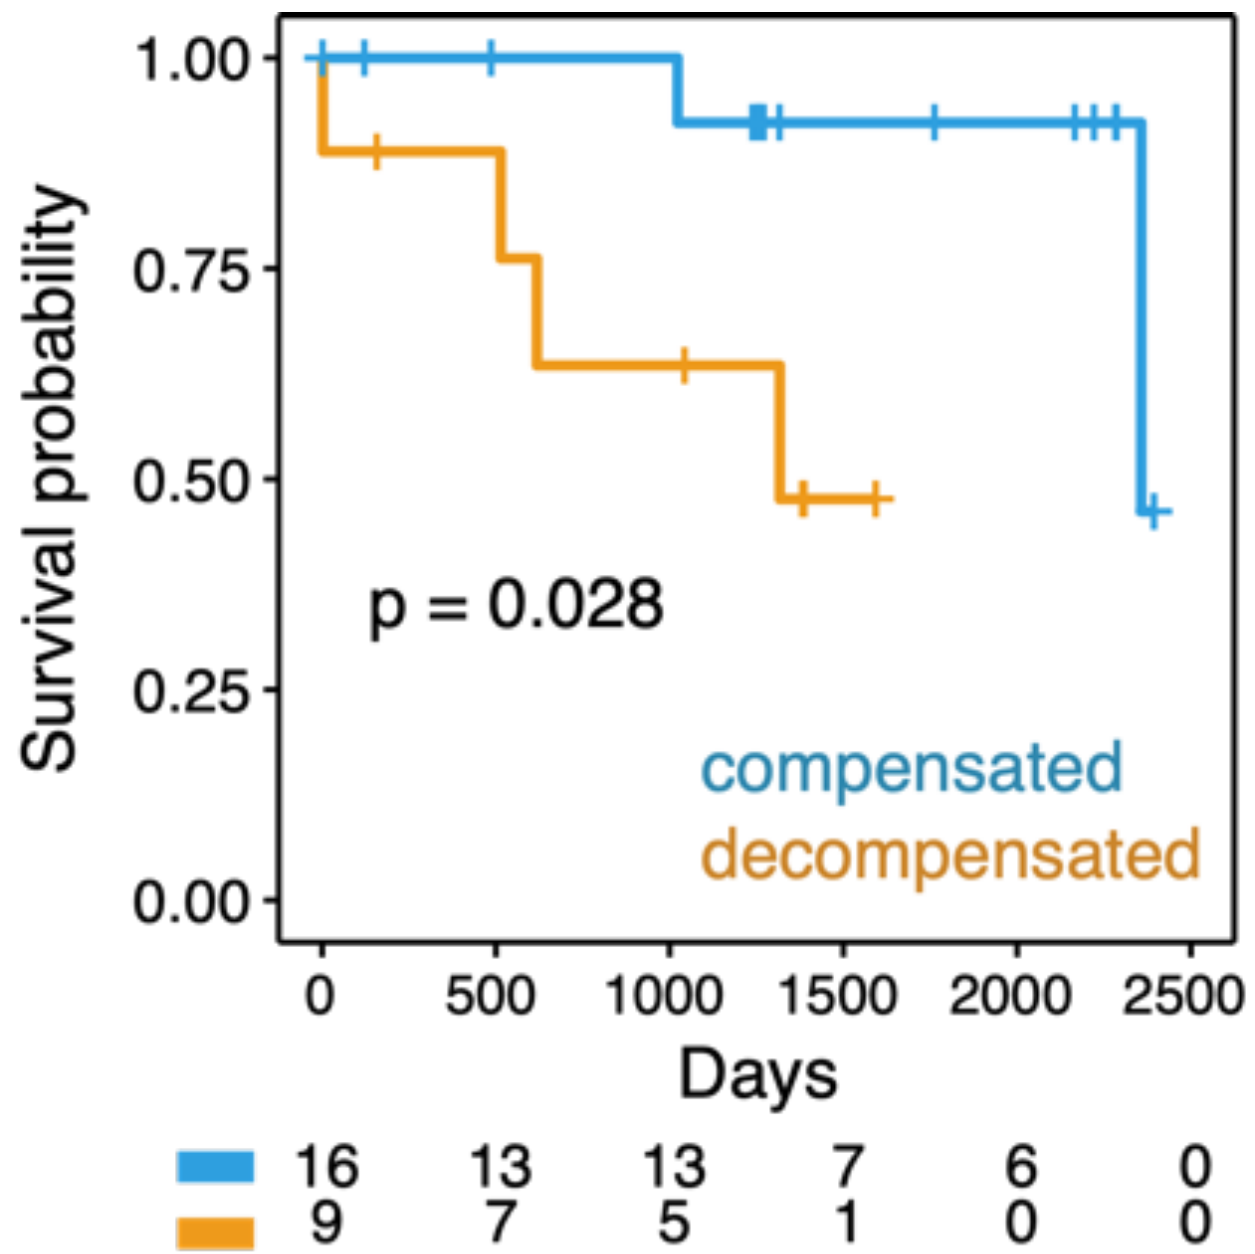

Supplement: NIHMS1845680-supplement-Supp_3.pdf [file NIHMS1845680-supplement-Supp_3.pdf]

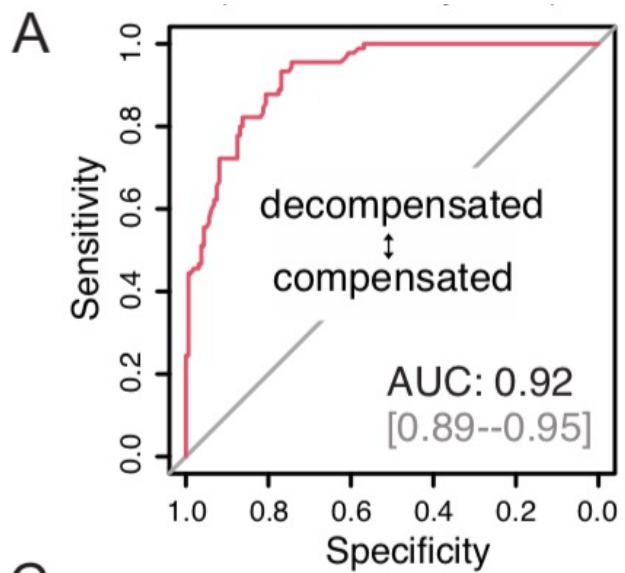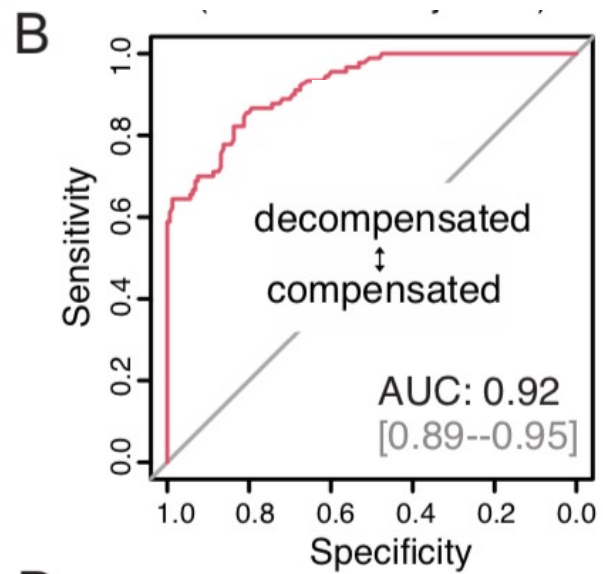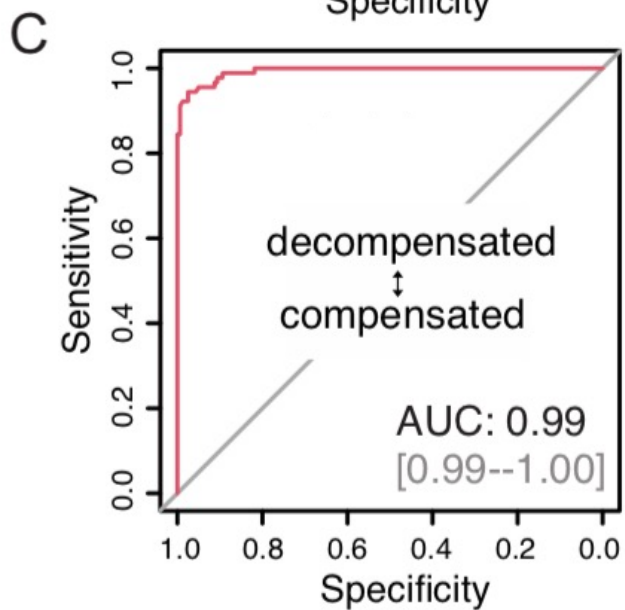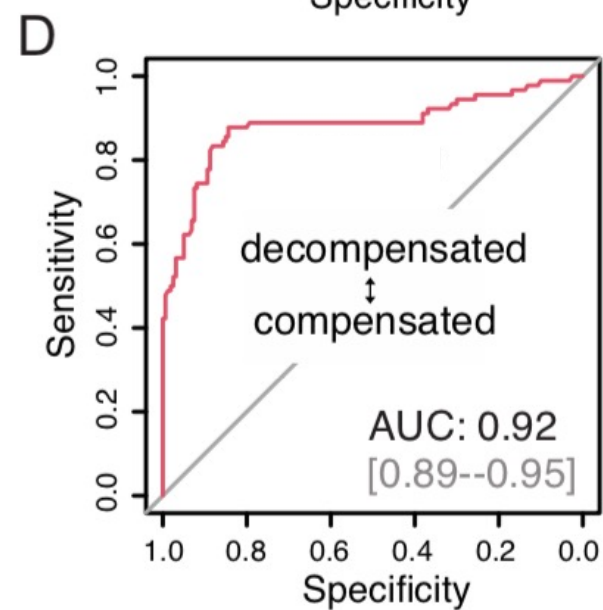

Supplement: NIHMS1845680-supplement-Supp_4.pdf [file NIHMS1845680-supplement-Supp_4.pdf]
